# Supplementary material for: Inhibition of Diverse DsbA Enzymes in Multi-DsbA Encoding Pathogens
Source: PubMed Central journal article supplement (PMC6067686; doi:10.1089/ars.2017.7104), 2018-09-01
Supplement: Supp_Data.pdf [file Supp_Data.pdf]

## Supplementary Data

| Phylum         | Protein | Gene ID    | Locus Tag  | PDB code  | Year of deposition | Resolution Å | % aa sequence ID to EcDsbA | Rmsd (Å, #Co to 1FVK) | Active sites | XX-dis Pro | Ref     |
|----------------|---------|------------|------------|-----------|--------------------|--------------|----------------------------|-----------------------|--------------|------------|---------|
| Proteobacteria | EcDsbA  | 948353     | b3860      | 1DSB/1FVK | 1993/1996          | 2.00/1.70    | 100                        | N/A                   | CPHC         | GVP        | (24)    |
|                | EcDsbL  | 1039926    | c3786      | 3C7M      | 2008               | 1.55         | 24                         | 2.1,162               | CPFC         | GVP        | (23)    |
|                | KpDsbA  | 17434048   | KPK_5512   | 4MCU      | 2013               | 1.99         | 81                         | 0.8, 182              | CPHC         | GVP        | (39)    |
|                | SeSrgA  | 1256229    | PSLT011    | 3L9V      | 2010               | 2.15         | 35                         | 1.4, 172              | CPPC         | GTP        |         |
|                | SeDsbA  | 1255523    | STM3997    | 3L9S      | 2010               | 1.58         | 85                         | 0.7, 178              | CPHC         | GVP        | (30)    |
|                | SeDsbL  | 1254716    | STM3193    | 3L9U      | 2010               | 1.57         | 25                         | 2.1, 161              | CPFC         | GVP        |         |
|                | PmDsbA  | 6800320    | PMI2828    | 4OCE      | 2014               | 1.77         | 56                         | 1.1, 179              | CPHC         | GVP        | (38)    |
|                | LpDsbA1 | 19831690   | lg0123     | 4IRR      | 2013               | 1.88         | 25                         | 2.3, 159              | CPWC         | AVP        | (37)    |
|                | PaDsbA1 | 877731     | PA5489     | 3H93      | 2009               | 1.50         | 30                         | 2.2, 164              | CPHC         | GVP        | (61)    |
|                | PaDsbA2 | 12576066   | PA14_59960 | 4N30      | 2013               | 1.30         | 12                         | 2.8, 116              | CPFC         | ATP        | (7)     |
|                | AbDsbA  | 6002733    | ABAYE3833  | 4P3Y      | 2014               | 2.15         | 31                         | 2.3, 163              | CPHC         | GVP        | (56)    |
|                | VcTcpg  | 2614468    | VC0034     | 18ED      | 1996               | 2.00         | 40                         | 1.3, 167              | CPHC         | GVP        | (33)    |
|                | XfDsbA  | 1126982    | XF1436     | 2REM      | 2007               | 1.90         | 19                         | 2.1, 167              | CPHC         | GTP        | (60)    |
|                | BpDsbA  | 3093149    | BPSL0381   | 4K2D      | 2013               | 1.90         | 27                         | 2.1, 160              | CPHC         | GVP        | (35)    |
|                | NmDsbA1 | 902389     | NMB0278    | 3DVM/3A3T | 2008/2009          | 1.50/2.10    | 23                         | 2.2, 157              | CPHC         | GTP        | (41,71) |
| NmDsbA3        | 902521  | NMB0407    | 3DVX/2ZNM  | 2008      | 2.80/2.30          | 22           | 2.2, 152                   | CVHC                  | STP          | (41,72)    |         |
| WpDsbA         | 2738597 | WD_1055    | 3F4R       | 2008      | 1.60               | 10           | 2.9, 137                   | CYHC                  | ATP          | (40)       |         |
| F              | BsBdbD  | 936031     | BSU3345    | 3GH9      | 2009               | 1.69         | 15                         | 2.7, 137              | CPSC         | ATP        | (16)    |
|                | SaDsbA  | 11935157   | MW2331     | 3BCI      | 2007               | 1.81         | 16                         | 1.3, 167              | CPYC         | TTP        | (27)    |
| A              | AoMdbA  | 1043210130 | ANA_1994   | 4Z7X      | 2015               | 1.55         | 18                         | 3.3, 141              | CSHC         | GTP        | (57)    |
|                | MtDsbA  | 888481     | Rv2969c    | 4KGX/4IHU | 2013/2012          | 1.97/1.90    | 19                         | 2.8, 123              | CPAC         | ATP        | (15,55) |
|                | CdMdbA  | 2649256    | DIP1880    | 5C00      | 2015               | 1.77         | 16                         | 2.4, 128              | CPHC         | SSP        | (58)    |

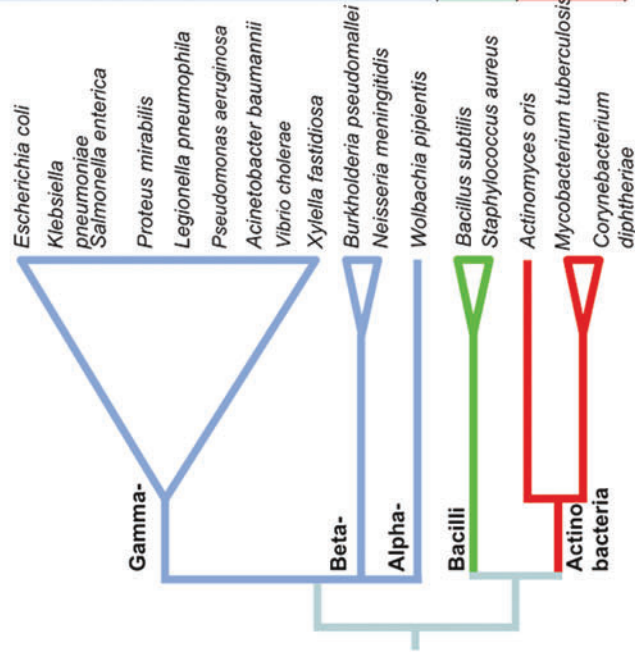

**SUPPLEMENTARY FIG. S1. Taxonomy common tree of bacteria encoding DsbA prototypes and summary of DsbA structures deposited in the PDB.** Seventeen bacterial species encoding the 22 DsbA enzymes analyzed in this study were selected from the NCBI taxonomy database to generate a common tree of this set of taxa. The obtained phylip tree was visualized and edited in FigTree v1.4 with nodes collapsed at the taxonomic unit of “Class,” (*node labels*). Bacterial phyla are also shown. F and A denote Firmicutes and Actinobacteria (tetrabacteria group), respectively.

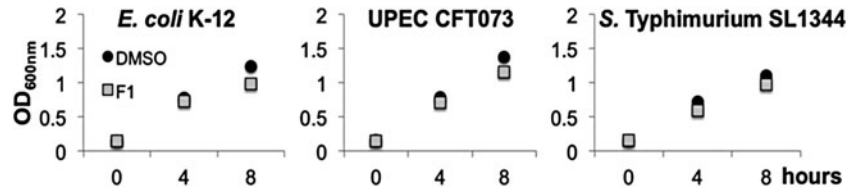

**SUPPLEMENTARY FIG. S2. Bacterial growth in the presence of small-molecule EcDsbA inhibitor F1.** Wild-type bacterial strains *E. coli* K-12, UPEC CFT073, and *S. Typhimurium* SL1344 were inoculated in liquid lysogeny broth media supplemented with 1 mM F1 inhibitor or 0.1% DMSO (carrier control), and culture optical density at 600 nm (OD<sub>600nm</sub>) was measured at 0, 4, and 8 h of shaking culture at 37°C. Mean ± standard deviation OD<sub>600</sub> values of *n* = 3 independent replicates are plotted. EcDsbA, *Escherichia coli* DsbA; DMSO, dimethyl sulfoxide; UPEC, uropathogenic *Escherichia coli*.

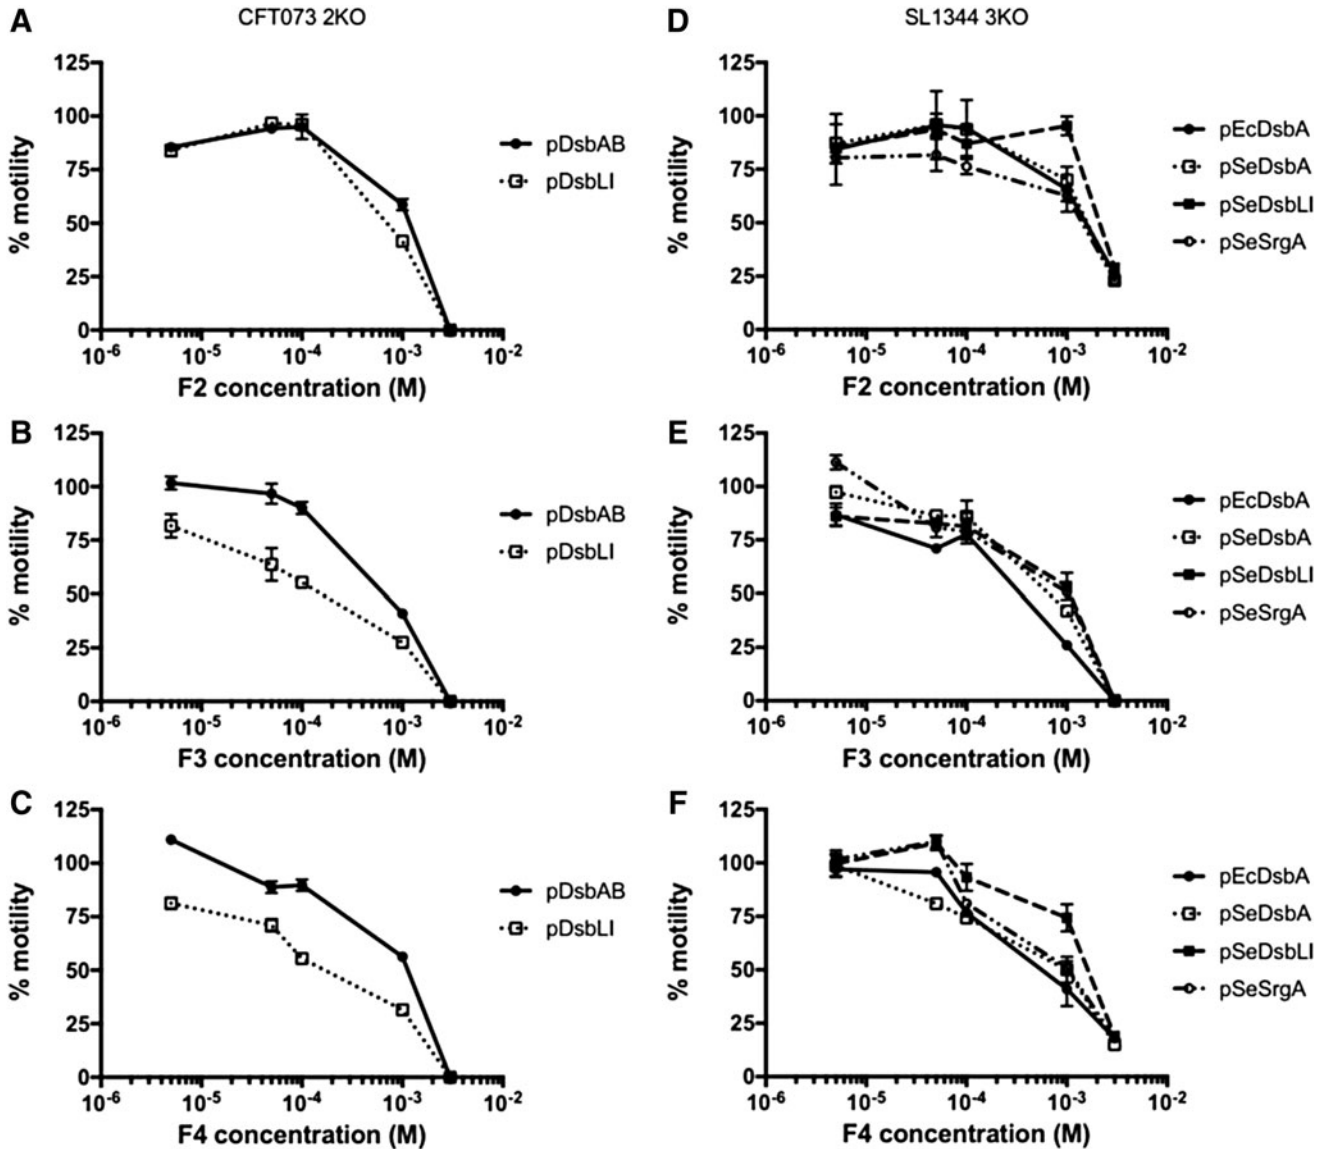

**SUPPLEMENTARY FIG. S3. Dose-dependent inhibition of UPEC (A–C) and *S. Typhimurium* (D–F) motility by inhibitors F2, F3, and F4.** Dose-response plots of relative motility for (A–C) UPEC CFT073 2KO transiently expressing DsbAB (closed circles) or DsbLI (open squares) and (D–F) *S. Typhimurium* SL1344 3KO complemented with EcDsbA (closed circles), SeDsbA (open squares), SeDsbLI (closed squares), or SeSrgA (open circles). Relative % motility was calculated by measuring the diameter of the motility zone for each strain in media containing 0.005, 0.05, 0.1, 1, or 3 mM of inhibitor F2, F3, or F4 and dividing by the diameter of the same strain swimming in DMSO-containing media (carrier control). Dot plots represent mean relative motility ± SEM of four independent replicates. SeDsbA, DsbA from *S. enterica* serovar Typhimurium; SEM, standard error of the mean.

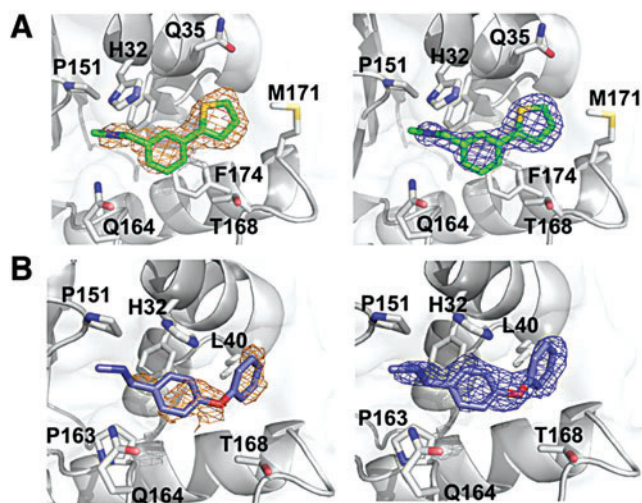

**SUPPLEMENTARY FIG. S4.** F1 and F3 compounds in complex with EcDsbA. Simulated annealing omit  $\sigma_A$ -weighted mFo-DFc electron density map of compounds F1 (A, left panel) and F3 (B, left panel) are contoured at  $2.5\sigma$  and displayed in orange mesh.  $\sigma_A$ -weighted 2mFo-DFc electron density map of compounds F1 (A, right panel) and F3 (B, right panel) are contoured at  $1\sigma$  and displayed in blue mesh.

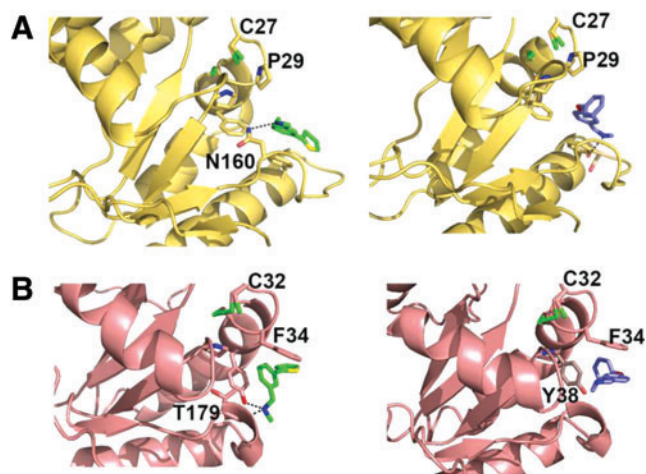

**SUPPLEMENTARY FIG. S6.** Docking of F1 and F3 with SrgA and DsbL showing the binding mode of top ranked docked poses of F1 (green) and F3 (slate blue) into SrgA (A) and DsbL (B) hydrophobic clefts. All four structures are rotated  $90^\circ$  around the vertical axis with respect to the orientation shown in Figure 7D, E and show that no steric clashes were observed between the compounds and the residues in the DsbA homologues.

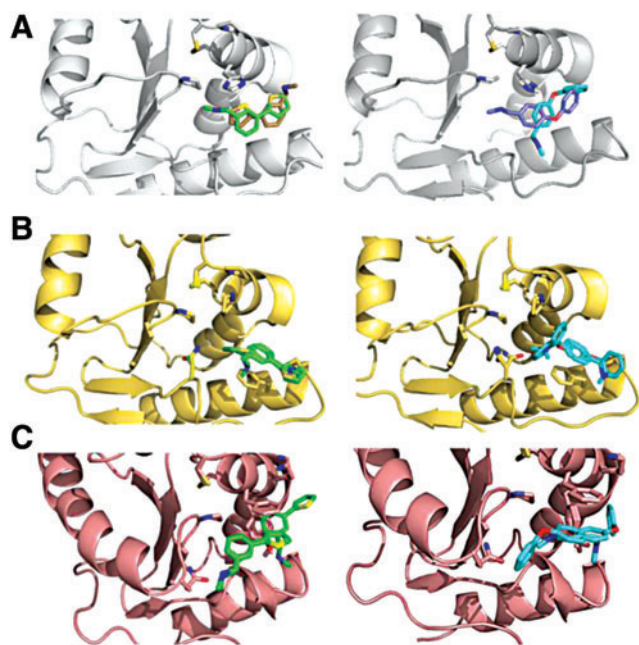

**SUPPLEMENTARY FIG. S5.** Molecular docking of F1 and F3 inhibitors with EcDsbA, SeSrgA, and SeDsbL. (A) Comparison of the crystal structures of EcDsbA-F1 (light green, left panel) and EcDsbA-F3 (slate, right panel) with the molecular docking of F1 (sand) and F3 (cyan) with EcDsbA. (B, C) Binding mode of top ranked docked poses into SrgA and DsbL groove. (B) SrgA with the 3 top docked conformations of F1 (predicted affinities range between  $-5.6$  and  $-5$  Kcal/mol, left panel) and F3 (predicted affinities range between  $-5.7$  and  $-5.6$  Kcal/mol, right panel). (C) DsbL with the three top docked conformations of F1 (predicted affinities range between  $-5.8$  and  $-5.5$  Kcal/mol, left panel) and F3 (predicted affinities range between  $-5.3$  and  $-5.1$  Kcal/mol, right panel).

SUPPLEMENTARY TABLE S1. X-RAY CRYSTALLOGRAPHY DATA COLLECTION AND REFINEMENT STATISTICS

| <i>Data collection</i>                                     | <i>Compound 1 6BR4</i>                              | <i>Compound 3 6BQX</i>                              |
|------------------------------------------------------------|-----------------------------------------------------|-----------------------------------------------------|
| Space group                                                | C2                                                  | C2                                                  |
| Cell dimensions (Å) (a, b, c)                              | (116.22, 63.94, 74.51)                              | (116.17, 64.01, 74.10)                              |
| Angles                                                     | $\alpha = \gamma = 90^\circ$ $\beta = 126.15^\circ$ | $\alpha = \gamma = 90^\circ$ $\beta = 125.73^\circ$ |
| Resolution (Å) <sup>a</sup>                                | 52.8–1.99 (2.06–1.99)                               | 48.4–1.99 (2.06–1.99)                               |
| Total number of observations                               | 1,09,444                                            | 1,10,612                                            |
| Number of unique observations                              | 29,804                                              | 30,096                                              |
| Multiplicity                                               | 3.7 (3.4)                                           | 3.7 (3.4)                                           |
| Data completeness (%)                                      | 98.0 (94.1)                                         | 98.9 (95.8)                                         |
| $\langle I/\sigma I \rangle$                               | 16.8 (3.5)                                          | 13.7 (2.9)                                          |
| $R_{merge}(\%)^b$                                          | 4.7 (26.1)                                          | 5.3 (33.1)                                          |
| Refinement                                                 |                                                     |                                                     |
| Resolution (Å)                                             | 52.8–1.99 (2.02–1.99)                               | 30.3–1.99 (2.04–1.99)                               |
| No. of reflections                                         | 29,800                                              | 27,019                                              |
| $R_{work}^c/R_{free}^d$                                    | 0.17/0.21 (0.46/0.53)                               | 0.18/0.24 (0.24/0.31)                               |
| No. atoms: protein                                         | 2972                                                | 2951                                                |
| No. atoms: water                                           | 291                                                 | 236                                                 |
| Wilson B                                                   | 34.45                                               | 33.30                                               |
| B factor (Å <sup>2</sup> )–all                             | 35.86                                               | 44.77                                               |
| B factor (Å <sup>2</sup> )–water                           | 42.13                                               | 46.92                                               |
| B factor (Å <sup>2</sup> )–protein                         | 35.24                                               | 44.41                                               |
| R.m.s. deviations                                          |                                                     |                                                     |
| Bond lengths (Å)                                           | 0.007                                               | 0.010                                               |
| Bond angles (°)                                            | 0.919                                               | 1.027                                               |
| Ramachandran plot                                          |                                                     |                                                     |
| Residues in most favored/ additionally allowed regions (%) | 98.12/1.88                                          | 97.3/2.7                                            |
| MolProbity score (percentile)                              | 1.08 (100th)                                        | 1.37                                                |

<sup>a</sup>Values in parentheses refer to the highest resolution shell.

<sup>b</sup>Agreement between intensities of repeated measurements of the same reflections can be defined as:

$$R_{merge} = \frac{\sum_{hkl} \sum_{i=1}^n |I_i(hkl) - \bar{I}(hkl)|}{\sum_{hkl} \sum_{i=1}^n I_i(hkl)}$$

where  $I_i(hkl)$  are individual values and  $\bar{I}(hkl)$  is the mean value of the intensity of reflection  $hkl$ .

<sup>c</sup> $R_{fac} = \sum_h |F_o - F_c| / \sum_h |F_o|$ , where  $F_o$  and  $F_c$  are the observed and calculated structure-factor amplitudes for each reflection “h.”

<sup>d</sup> $R_{free}$  was calculated with 5% of the diffraction data selected randomly and excluded from refinement.

SUPPLEMENTARY TABLE S2. TABLE OF BACTERIAL STRAINS AND PLASMIDS

| <i>Strain name</i>        | <i>Description</i>                             | <i>Ref.</i> |
|---------------------------|------------------------------------------------|-------------|
| MG1655                    | <i>E. coli</i> K-12 (OR:H48:K-)                | (8)         |
| CFT073                    | UPEC isolate (O6:K2:H1)                        | (51)        |
| CFT073 2KO                | CFT073 <i>dsbABdsbLI</i>                       | (68)        |
| CFT073 2KO + pDsbAB       | CFT073 <i>dsbABdsbLI</i> pDsbAB                | (68)        |
| CFT073 2KO + pDsbLI       | CFT073 <i>dsbABdsbLI</i> pDsbLI                | (68)        |
| CFT073 2KO + empty vector | CFT073 <i>dsbABdsbLI</i> pUC19                 | (68)        |
| SL1344                    | <i>Salmonella enterica</i> serovar Typhimurium | (31)        |
| SL1344 3KO                | SL1344 <i>dsbA,dsbLI,srgA</i>                  | (30)        |
| SL1344 3KO + pDsbA        | SL1344 <i>dsbA,dsbLI,srgA</i> pSeDsbA          | (30)        |
| SL1344 3KO + pDsbLI       | SL1344 <i>dsbA,dsbLI,srgA</i> pSeDsbLI         | (30)        |
| SL1344 3KO + pSrgA        | SL1344 <i>dsbA,dsbLI,srgA</i> pSeSrgA          | (30)        |
| SL1344 3KO + pEcDsbA      | SL1344 <i>dsbA,dsbLI,srgA</i> pEcDsbA          | This study  |
| SL1344 3KO + empty vector | SL1344 <i>dsbA,dsbLI,srgA</i> pWSK29           | (30)        |

UPEC, uropathogenic *Escherichia coli*.
